# Supplementary material for: Distinct and evolutionary conserved structural features of the human nuclear exosome complex
Source: eLife journal article supplement (doi:10.7554/elife.38686), 2018-07-26
Supplement: supp [file elife-38686-supp-v1.zip]

3D classification with mask diam. 300 Å  
691,785 particles

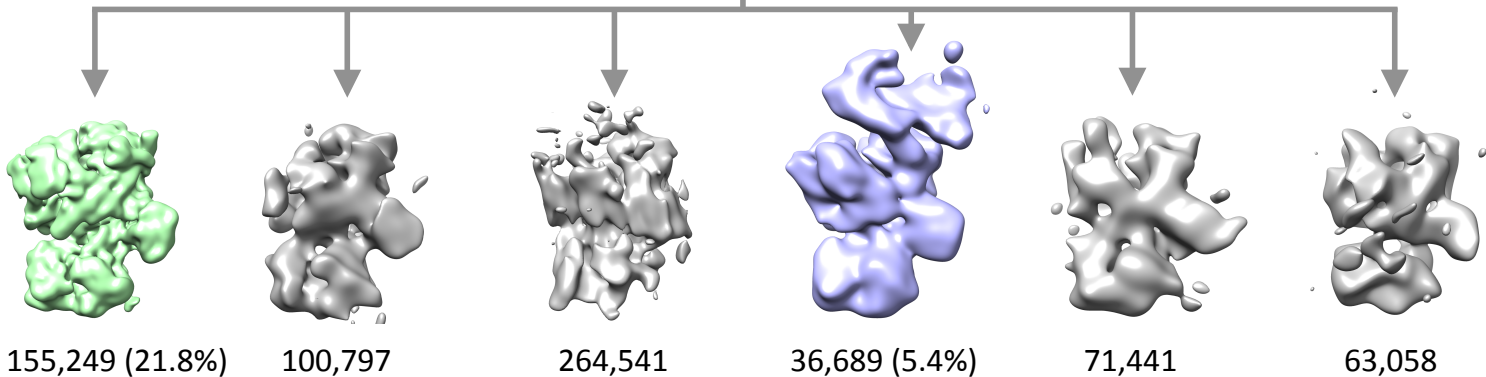

3D classification:  
25it + 25it with 0.5 sampling param.

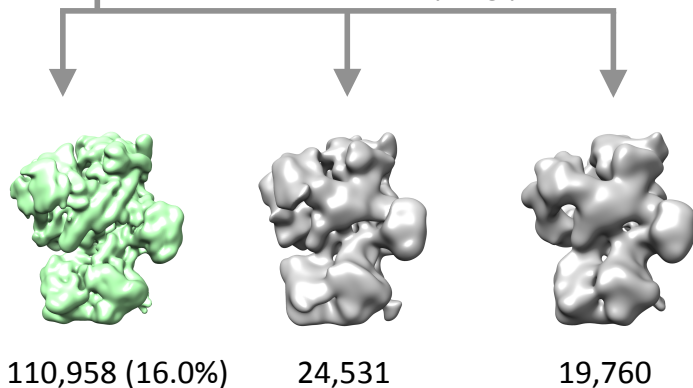

Refined  
PostProcessed  
**3.80 Å**

3D classification:  
25it + 25it with 0.5 sampling param.

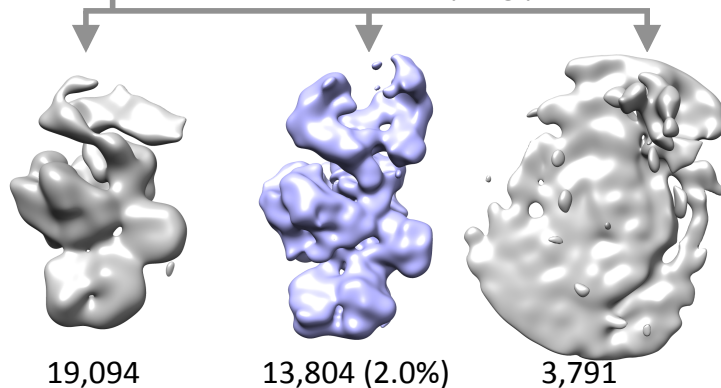

Refined  
PostProcessed  
**6.25 Å**
