# Supplementary material for: Distinct and evolutionary conserved structural features of the human nuclear exosome complex
Source: eLife journal article supplement (doi:10.7554/elife.38686), 2018-07-26
Supplement: supp [file elife-38686-supp-v1.zip]

Archive with 8 entries (8 files):
- elife_poa_e38686_Figure_7_source_data_1.docx
- elife_poa_e38686_Figure_3_figure_supplement_1.pdf
- elife_poa_e38686_Figure_5_figure_supplement_1.pdf
- elife_poa_e38686_Figure_3_figure_supplement_2.pdf
- elife_poa_e38686_Transparent_Reporting_File.pdf
- elife_poa_e38686_Figure_2_figure_supplement_2.pdf
- elife_poa_e38686_Figure_2_figure_supplement_1.pdf
- elife_poa_e38686_Figure_2_figure_supplement_3.pdf
