# Supplementary figures and images for: Distinct and evolutionary conserved structural features of the human nuclear exosome complex
Source: eLife journal article supplement (doi:10.7554/elife.38686), 2018-07-26

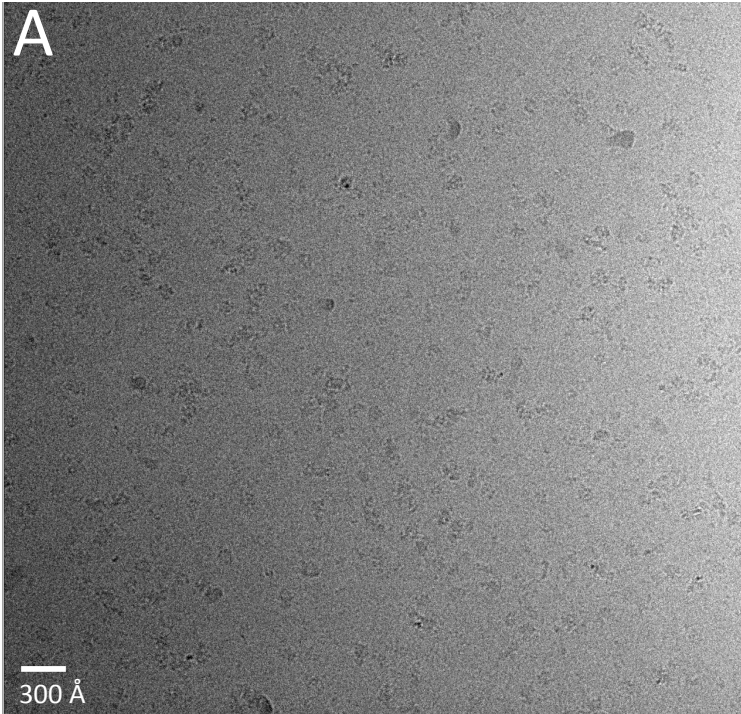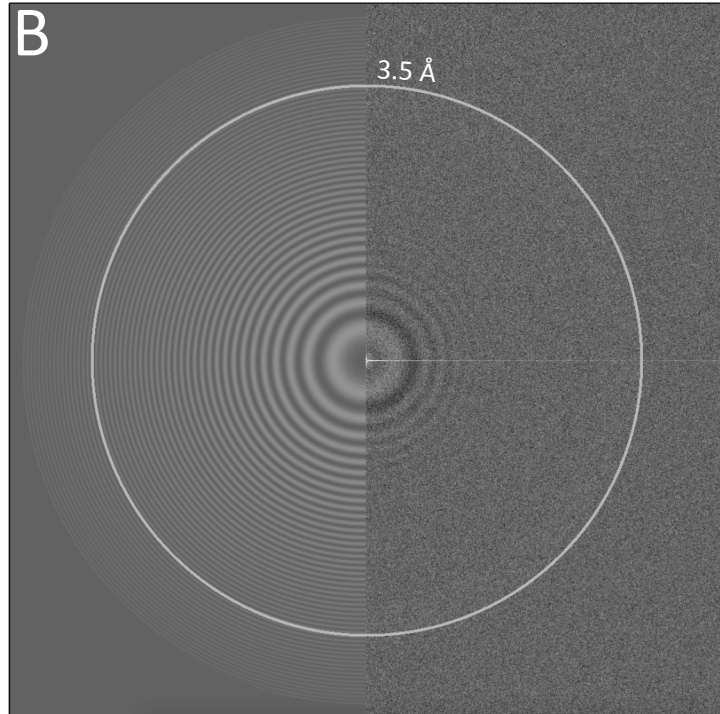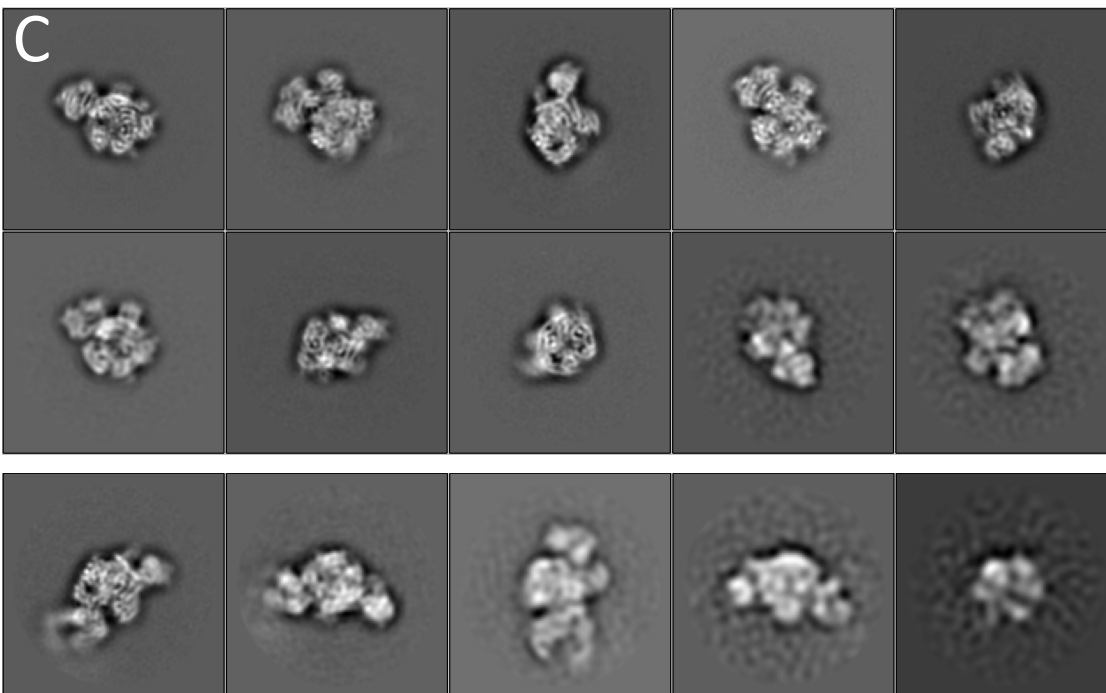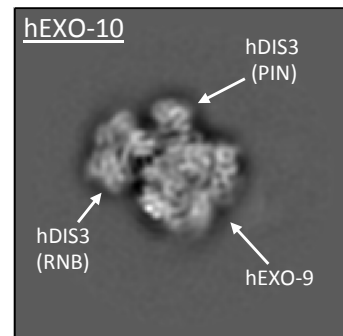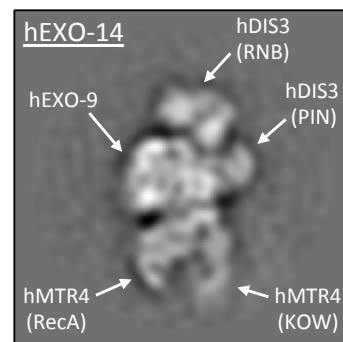

Supplement: supp [file elife-38686-supp-v1.zip]

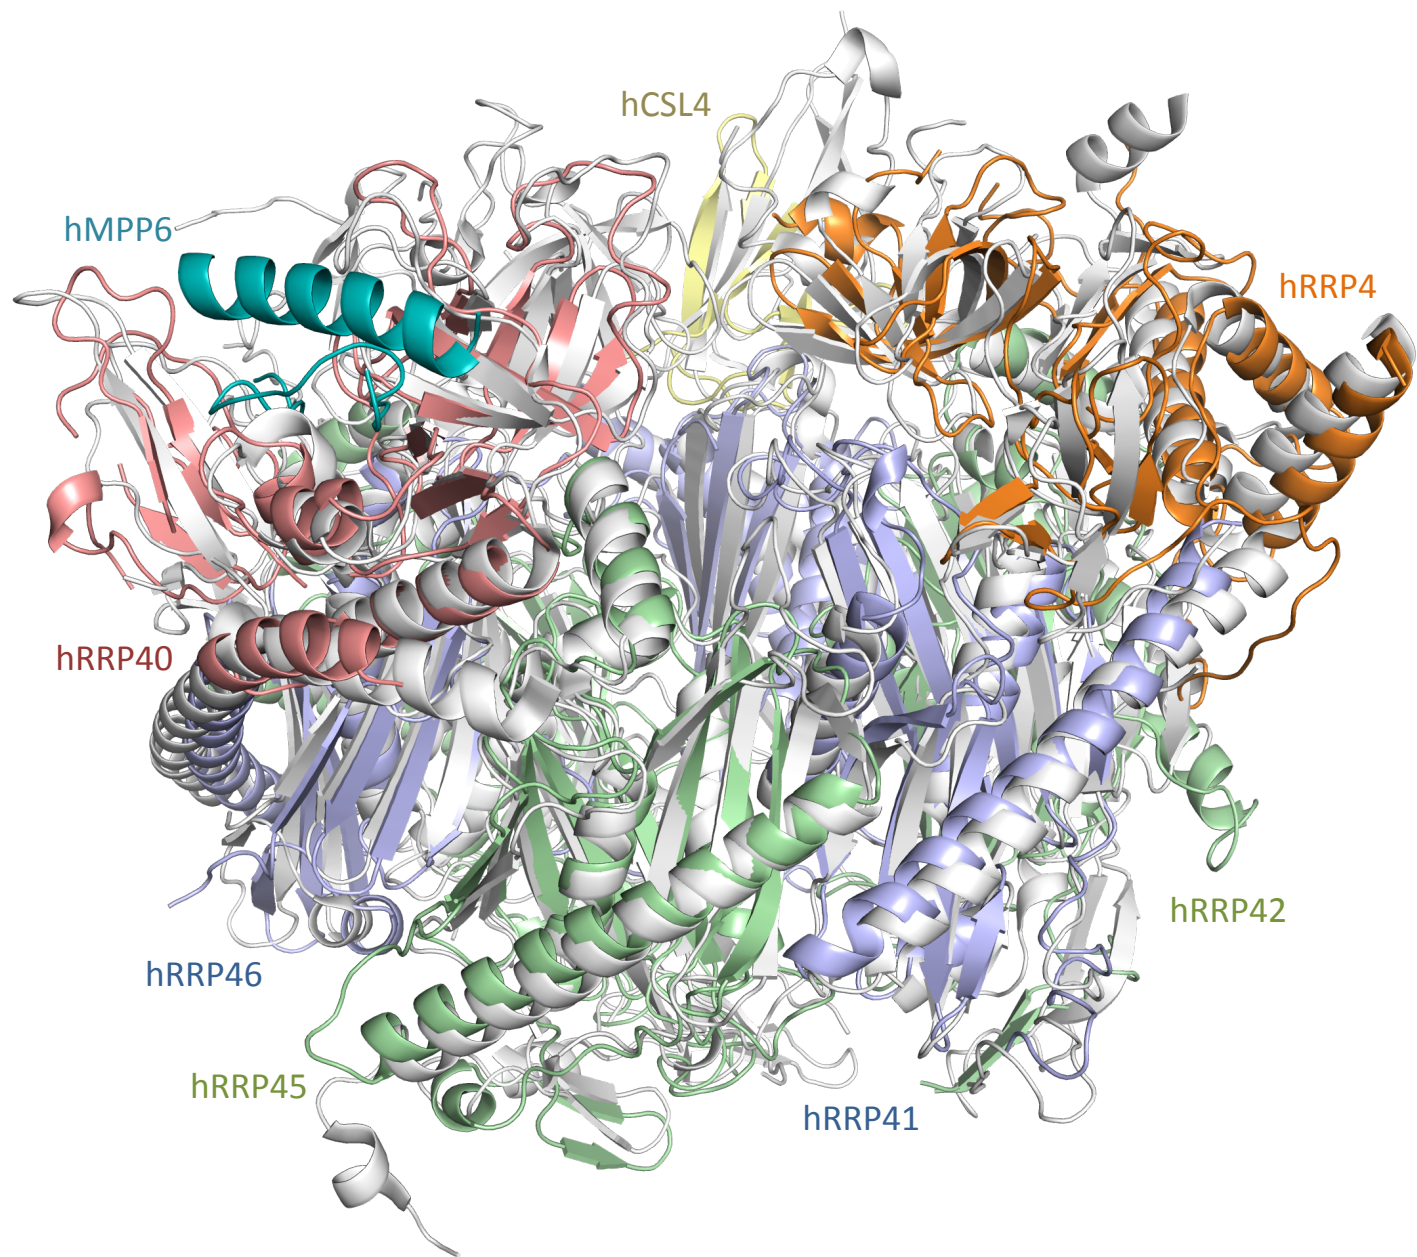

Supplement: supp [file elife-38686-supp-v1.zip]

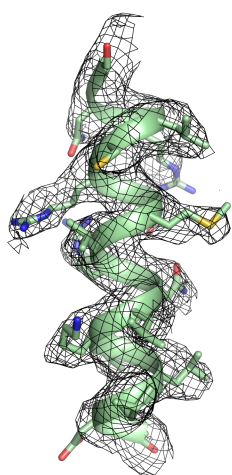

hRRP45 (96-113)

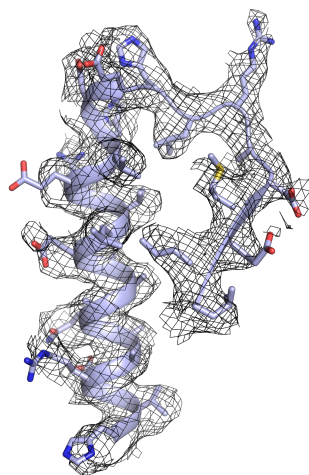

hRRP41 (197-224)

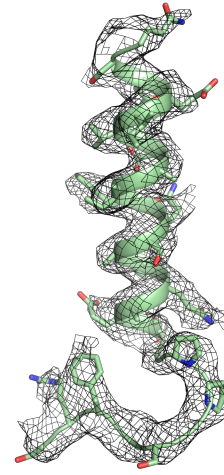

hRRP43 (91-117)

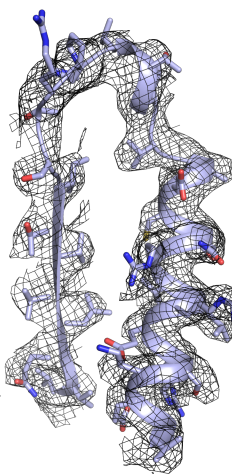

hRRP46 (89-123)

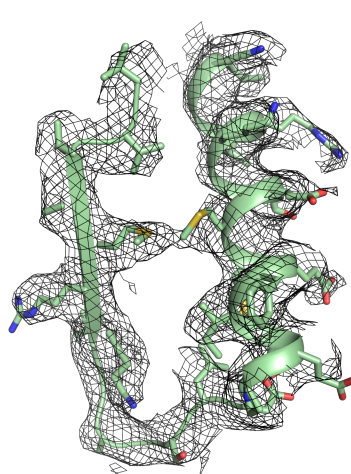

hRRP42 (235-265)

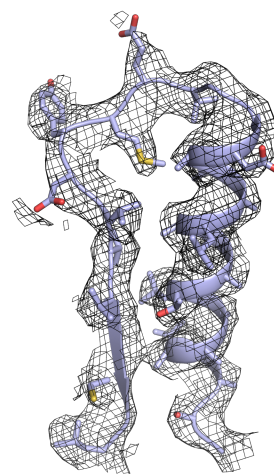

hMTR3 (155-185)

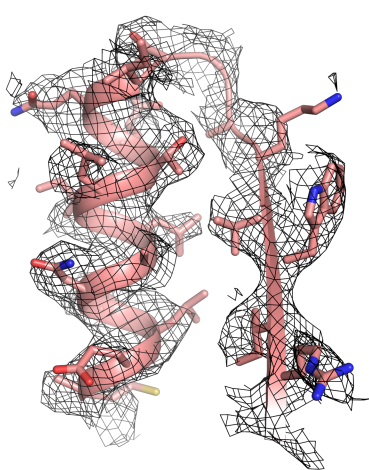

hRRP40 (235-258)

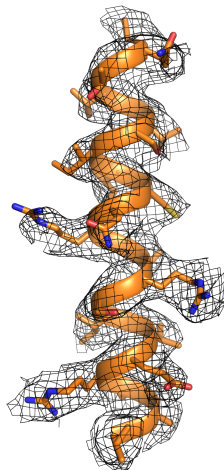

hRRP4 (228-248)

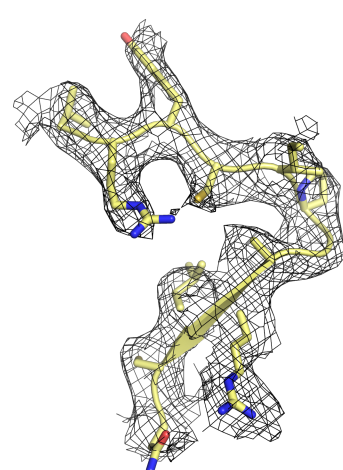

hCSL4 (5-16)

Supplement: supp [file elife-38686-supp-v1.zip]

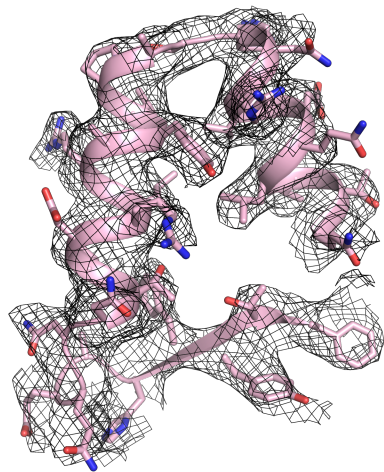

hDIS3-PIN (92-123)

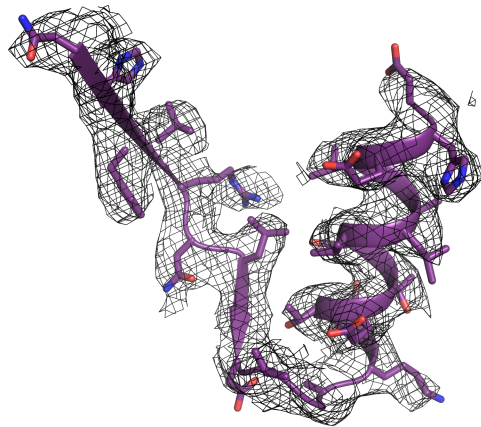

hDIS3-CSD2 (413-438)

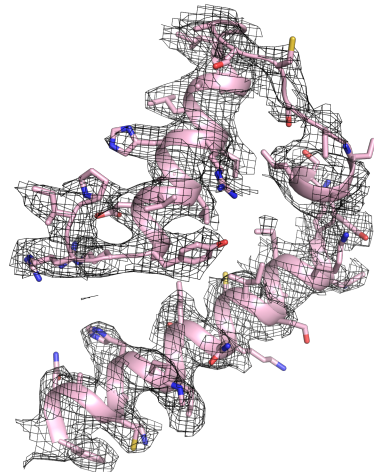

hDIS3-RNB (778-826)

Supplement: supp [file elife-38686-supp-v1.zip › elife_poa_e38686_Figure_5_figure_supplement_1.pdf]

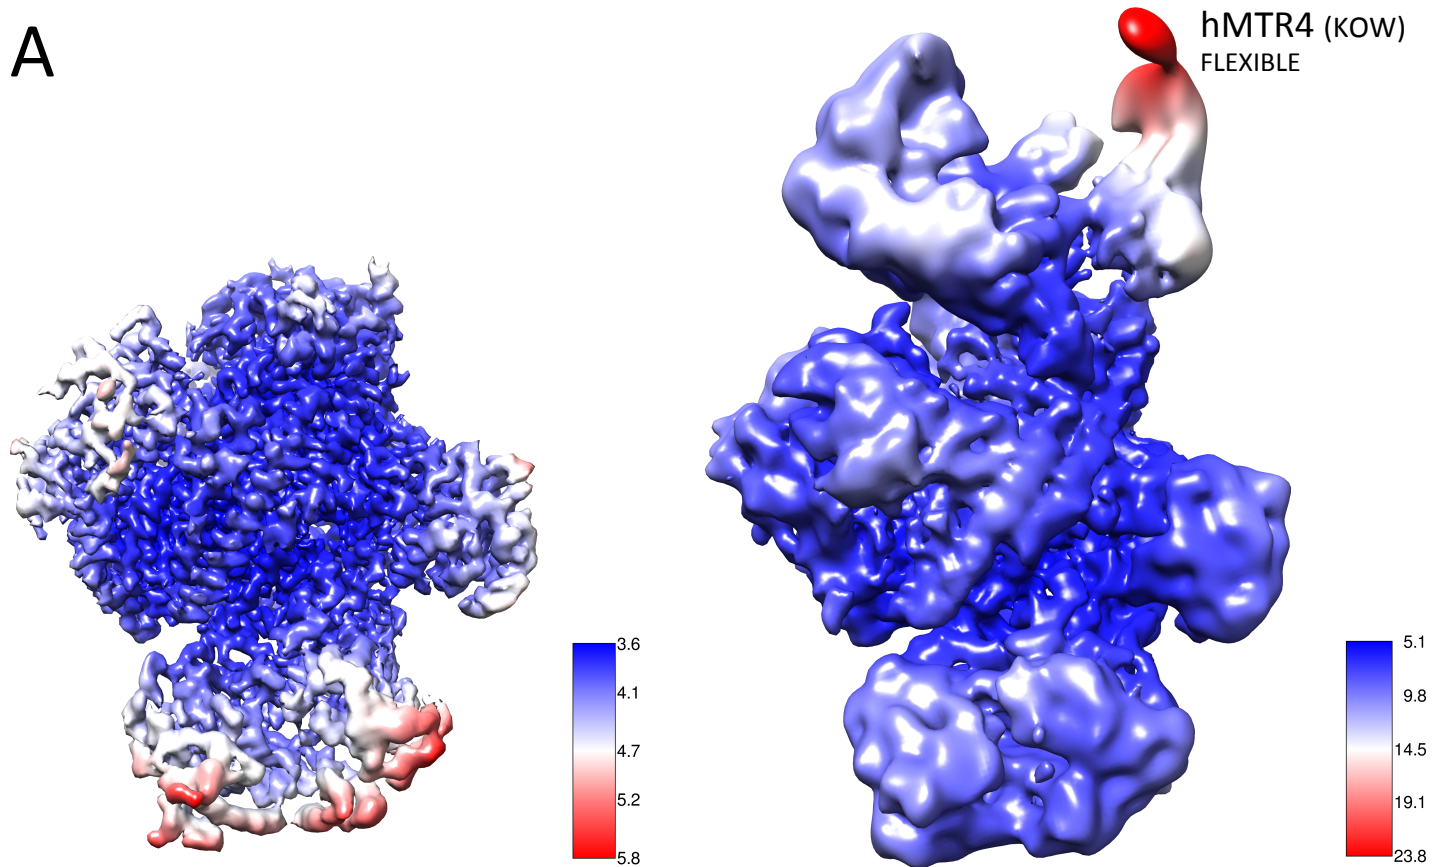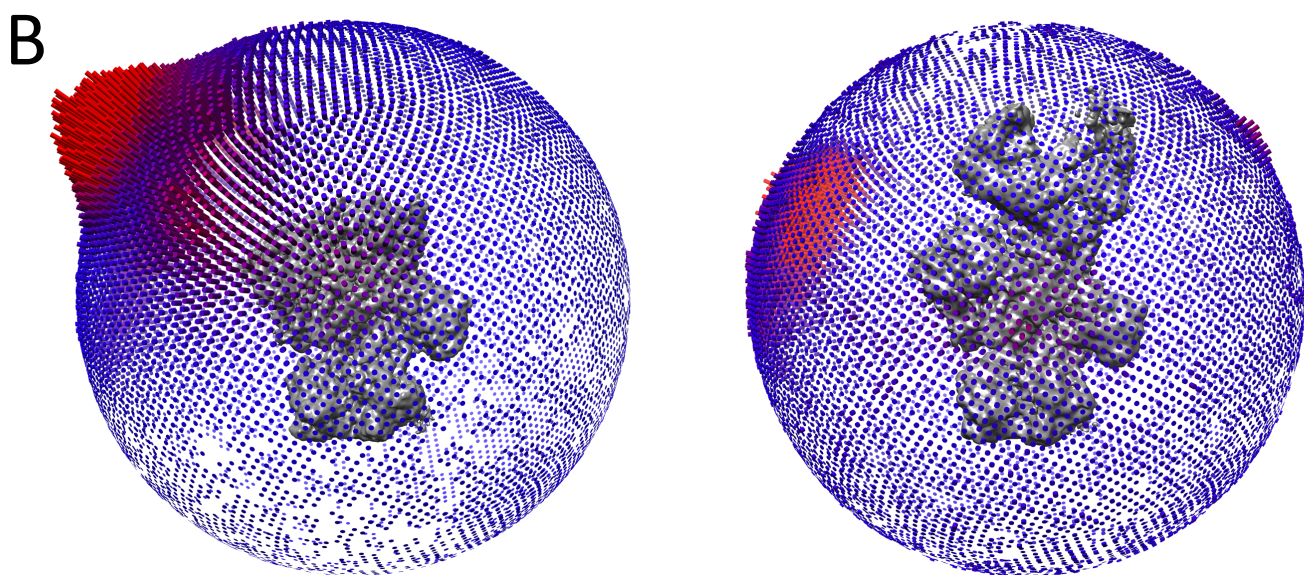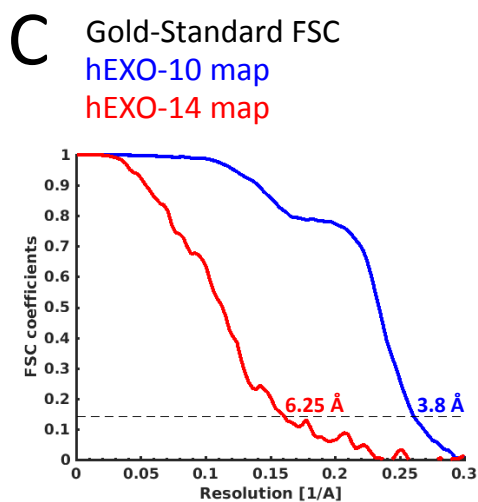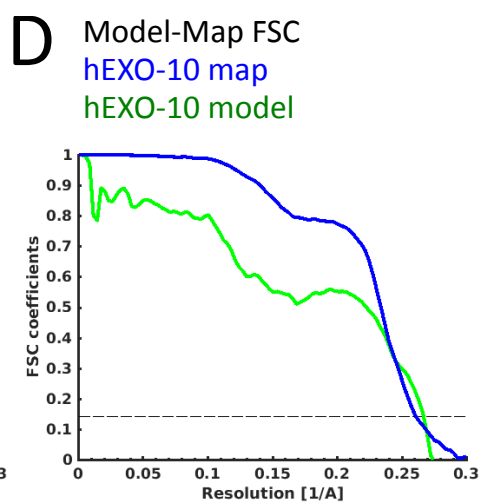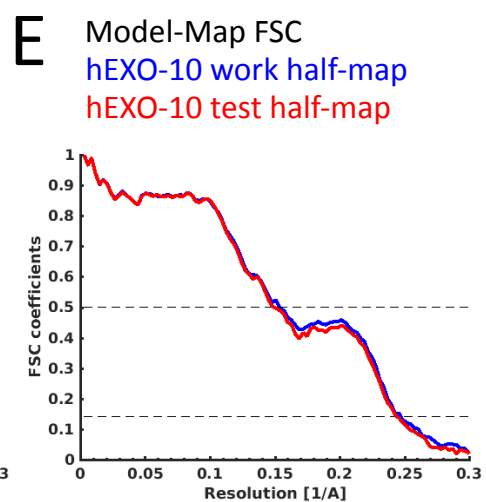

Supplement: supp [file elife-38686-supp-v1.zip › elife_poa_e38686_Figure_2_figure_supplement_3.pdf]
